# Supplementary material for: Highly flexible, tailorable and all-solid-state supercapacitors from carbon nanotube–MnOx composite films
Source: Royal Society of Chemistry journal article supplement (doi:10.1039/c5ra16771j), 2015-01-01
Supplement: c5ra16771j1.pdf [file c5ra16771j1.pdf]

## Supporting Information

### **Highly flexible, tailorable and all-solid-state supercapacitors from carbon nanotube-MnO<sub>x</sub> composite films**

*Fengmei Guo, Ruiqiao Xu, Xian Cui, Xiaobei Zang, Li Zhang, Qiao Chen, Kunlin*

*Wang and Jinquan Wei\**

*Key Lab for Advanced Materials Processing Technology of Education Ministry; State  
Key Lab of New Ceramic and Fine Processing; School of Materials Science and  
Engineering, Tsinghua University, Beijing 100084, P.R. China*

\*E-mail: [jqwei@tsinghua.edu.cn](mailto:jqwei@tsinghua.edu.cn)

**This file includes:**

Figs. S1 and S7

Tables S1 and S3

Caption for Video S1

## 1. Figures

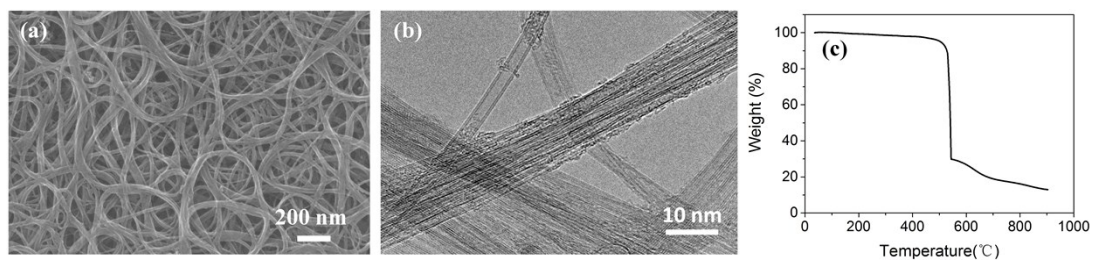

**Fig. S1** Characterization of the purified TEM films. (a) SEM image, (b) Transmission electron microscope image, (c) Thermal gravimetric analysis (TGA) curve.

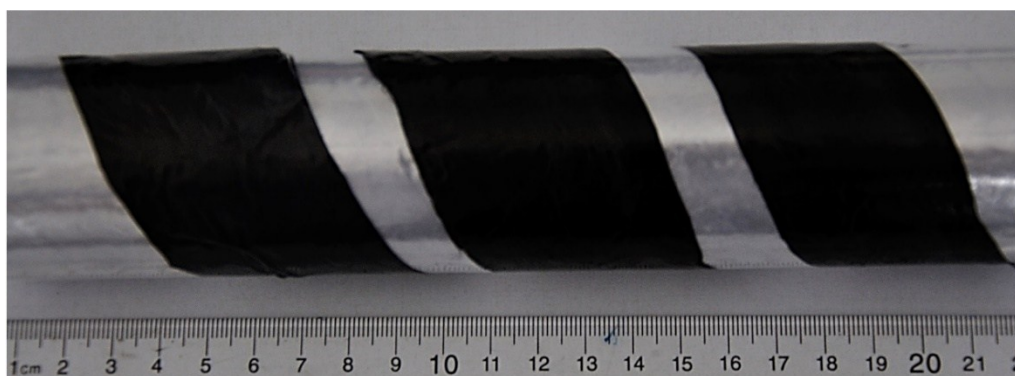

**Fig. S2** Optical image of a purified CNT film winding on a cylinder.

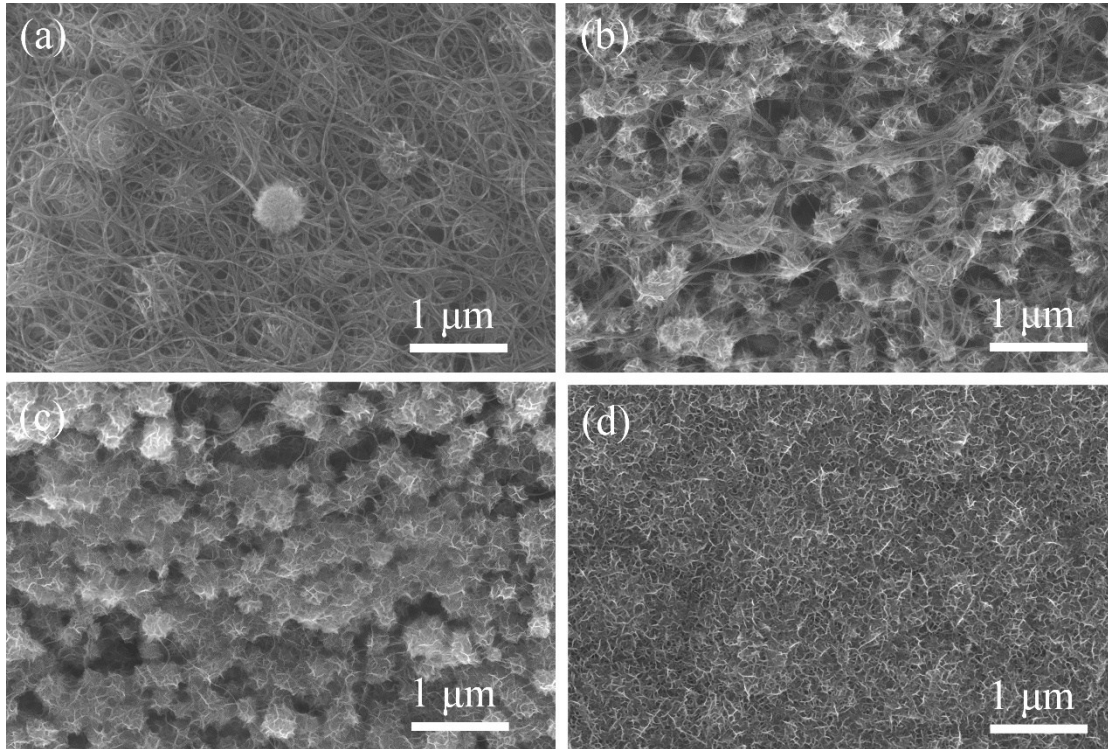

**Fig. S3** SEM images of the CNT-MnO<sub>x</sub> films prepared from different deposition times. (a)100 s, (b)300 s, (c) 600 s, (d)1200 s.

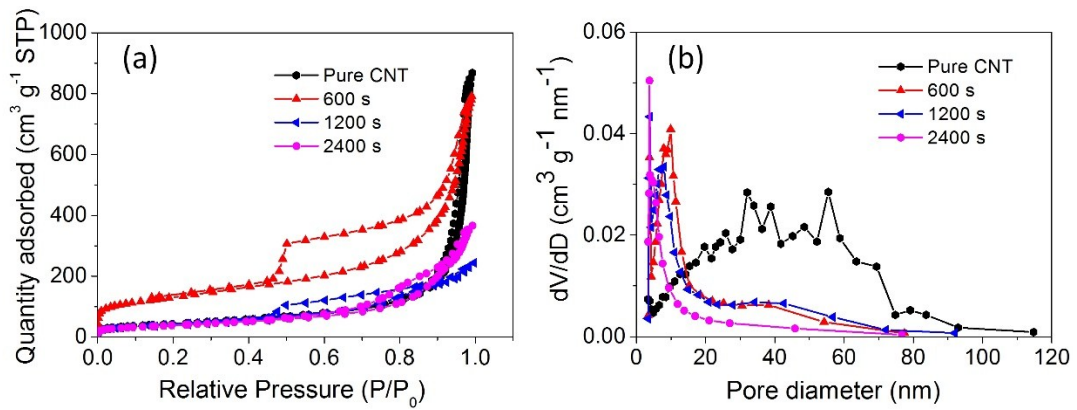

**Fig. S4** Specific surface area (a) and pore size distribution (b) of the pure CNT film and the CNT-MnO<sub>x</sub> composite films prepared at 600, 1200, and 2400 s. The corresponding specific surface area are 159, 157, 155, and 141 m<sup>2</sup>/g; and the pore size distribute mainly at 55.4, 9.9, 3.9, and 3.8 nm, respectively.

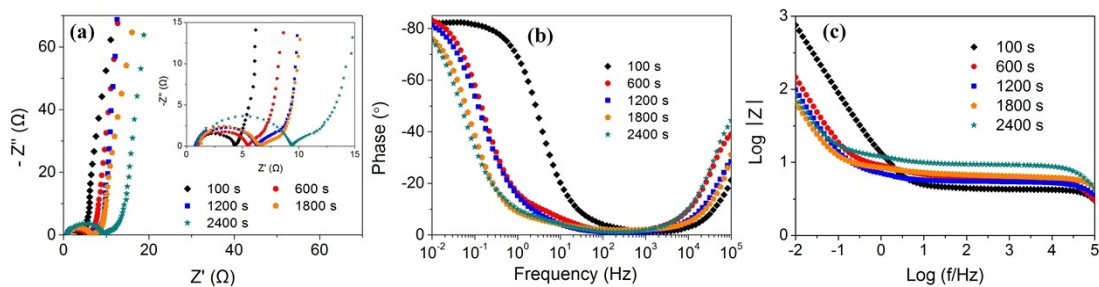

**Fig. S5** EIS of the CNT-MnO<sub>x</sub> composite electrodes prepared at different deposition times. (a) Nyquist plots, (b) and (c) are Bode plots.

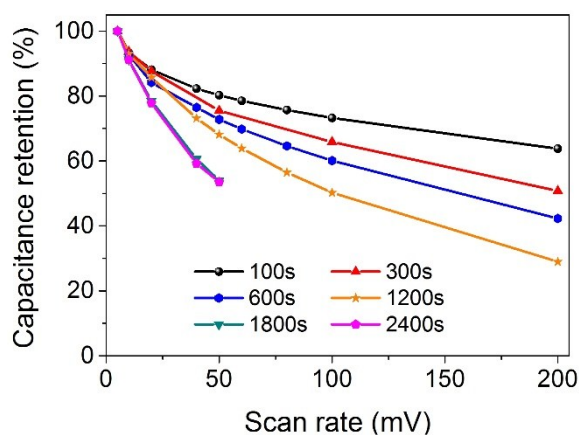

**Fig. S6** Capacitance retention rate of the flexible CNT-MnO<sub>x</sub> composite film electrodes prepared at different deposition times.

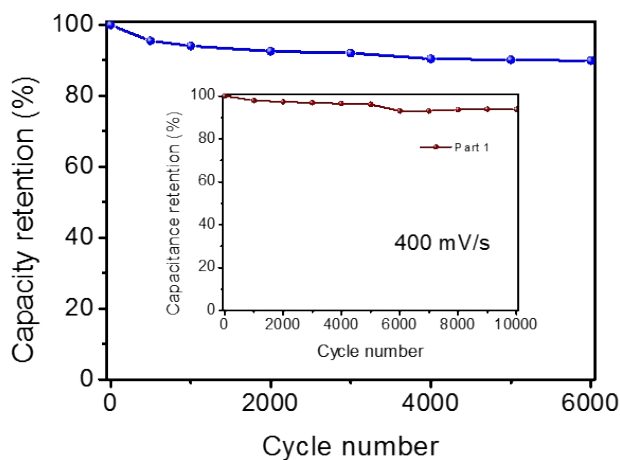

**Figure S7.** Cyclic stability of a CNT-MnO<sub>x</sub> supercapacitor. Inset is the cyclic test result of a small piece of supercapacitor cut from the original one.

## 2. Tables

**Table S1.** The specific capacitance of the CNT-MnO<sub>x</sub> composite films depending on the loading of MnO<sub>x</sub> at a scan rate of 5 mV/s.

| Deposition time (s) | MnO <sub>x</sub> loading (wt.%) | Specific capacitance (F/g) | Areal capacitance (F/cm <sup>2</sup> ) |
|---------------------|---------------------------------|----------------------------|----------------------------------------|
| 100                 | 62.5                            | 119.2                      | 19.1                                   |
| 300                 | 80.5                            | 160.3                      | 55.2                                   |
| 600                 | 86.4                            | 165.4                      | 134.0                                  |
| 800                 | 88.1                            | 166.3                      | 156.5                                  |
| 1000                | 89.4                            | 168.0                      | 157.9                                  |
| 1200                | 90.5                            | 175.9                      | 184.7                                  |
| 1800                | 93.9                            | 172.5                      | 282.9                                  |
| 2400                | 94.9                            | 170.5                      | 366.6                                  |

**Table S2.** Time constant, charge transfer resistance and high frequency resistance

| Deposition time (s) | Time constant $\tau_0$ (s) | CTR ( $\Omega$ ) | HFR ( $\Omega$ ) (f = 97.7 HZ) |
|---------------------|----------------------------|------------------|--------------------------------|
| 100                 | 0.050                      | 3.3              | 4.4                            |
| 600                 | 0.895                      | 4.5              | 6.3                            |
| 1200                | 1.084                      | 5.4              | 5.5                            |
| 1800                | 1.928                      | 5.4              | 6.8                            |
| 2400                | 2.830                      | 8.5              | 9.5                            |

$\tau_0$  - Time constant, CTR - Charge transfer resistance, HFR - High frequency resistance

**Table S3.** Capacitive performance of three supercapacitors using in powering a stopwatch and LED light at 5 mA/cm<sup>2</sup>.

| Supercapacitor | Specific capacitance (F/g) | Energy density (Wh/kg) | Power density (kW/kg) |
|----------------|----------------------------|------------------------|-----------------------|
| 1#             | 55.8                       | 4.3                    | 0.523                 |
| 2#             | 99.3                       | 7.9                    | 0.657                 |
| 3#             | 62.6                       | 4.9                    | 0.669                 |

### **3. Video**

Video S1: A video of a purified CNT macro-film under twisting and recovering.
